# Supplementary material
Source: PubMed Central journal article supplement (PMC6632180)
Supplement: jamainternmed-179-1220-s001.pdf [file jamainternmed-179-1220-s001.pdf]

## Supplementary Online Content

Alore EA, Suliburk JW, Ramsey DJ, et al. Diagnosis and management of primary hyperparathyroidism across the Veterans Affairs health care system. *JAMA Intern Med*. Published online July 15, 2019.

doi:10.1001/jamainternmed.2019.1747

**eTable.** Comorbid Conditions Included in the Elixhauser Comorbidity Index

**eFigure.** Indications for Parathyroidectomy by Consensus Guidelines Over Time

This supplementary material has been provided by the authors to give readers additional information about their work.

**eTable.** Comorbid Conditions Included in the Elixhauser Comorbidity Index

|    |                                 |    |                                                  |
|----|---------------------------------|----|--------------------------------------------------|
| 1  | AIDS                            | 16 | Liver disease                                    |
| 2  | Alcohol abuse                   | 17 | Lymphoma                                         |
| 3  | Blood loss anemia               | 18 | Metastatic cancer                                |
| 4  | Cardiac arrhythmias             | 19 | Obesity                                          |
| 5  | Chronic pulmonary disease       | 20 | Other neurological disorders                     |
| 6  | Coagulopathy                    | 21 | Paralysis                                        |
| 7  | Congestive heart failure        | 22 | Peptic ulcer disease excluding bleeding          |
| 8  | Deficiency anemias              | 23 | Peripheral vascular disorders                    |
| 9  | Depression                      | 24 | Psychoses                                        |
| 10 | Diabetes, complicated           | 25 | Pulmonary circulation disorders                  |
| 11 | Diabetes, uncomplicated         | 26 | Renal failure                                    |
| 12 | Drug abuse                      | 27 | Rheumatoid arthritis/ collagen vascular diseases |
| 13 | Fluid and electrolyte disorders | 28 | Solid tumor without metastasis                   |
| 14 | Hypertension                    | 29 | Valvular disease                                 |
| 15 | Hypothyroidism                  | 30 | Weight loss                                      |

**eFigure.** Indications for Parathyroidectomy by Consensus Guidelines Over Time

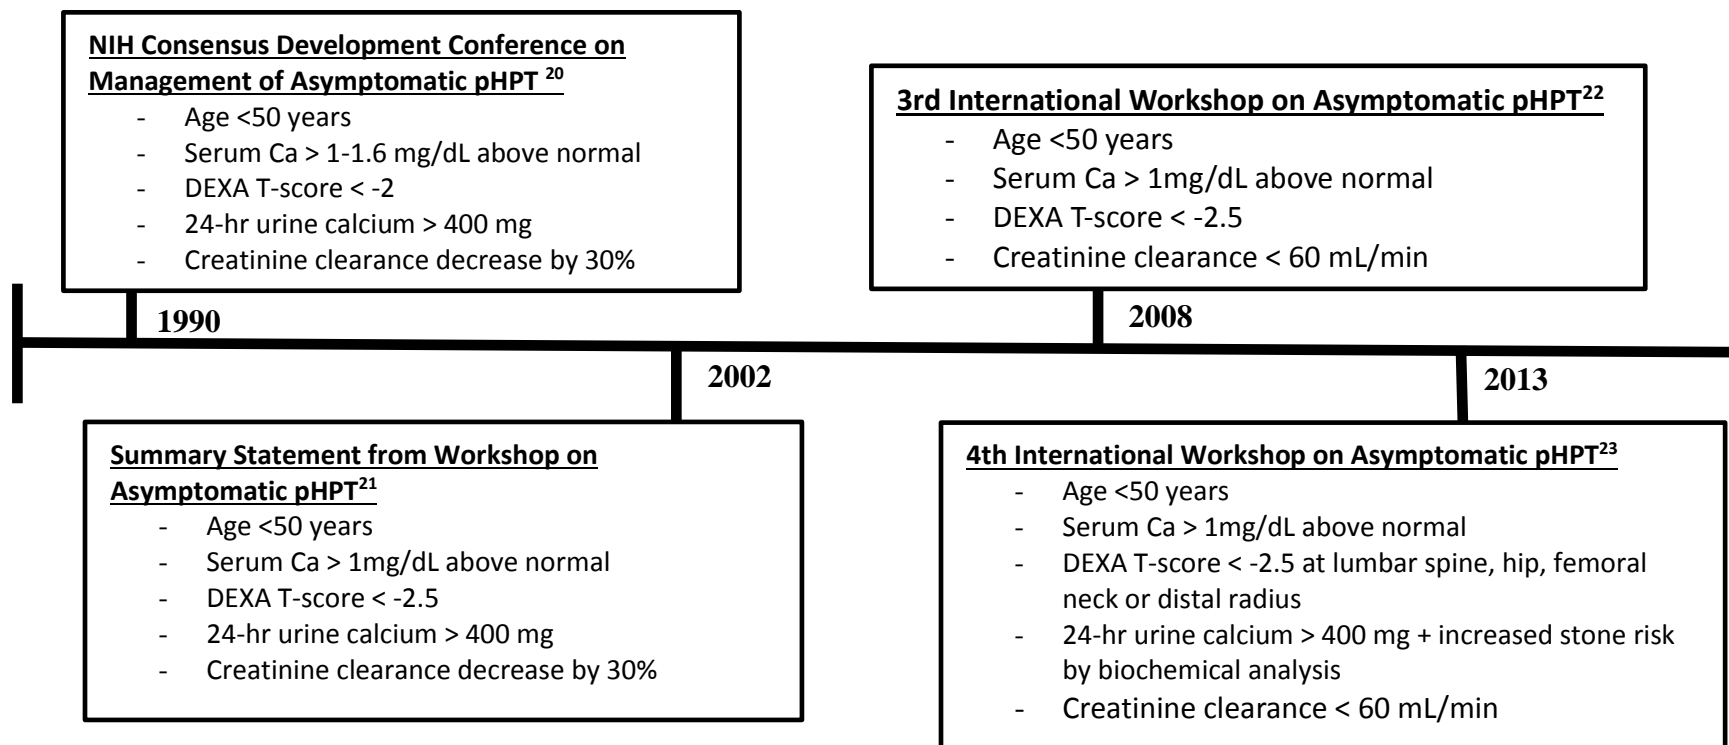

Abbreviations: NIH = National Institutes of Health; DEXA = Dual-energy X-ray absorptiometry; pHPT = primary hyperparathyroidism
